# Supplementary material
Source: Springer Nature journal article supplement (https://www.springermedizin.de/resource/supplementary/12960_2004_15_MOESM3_ESM.pdf/9570258)

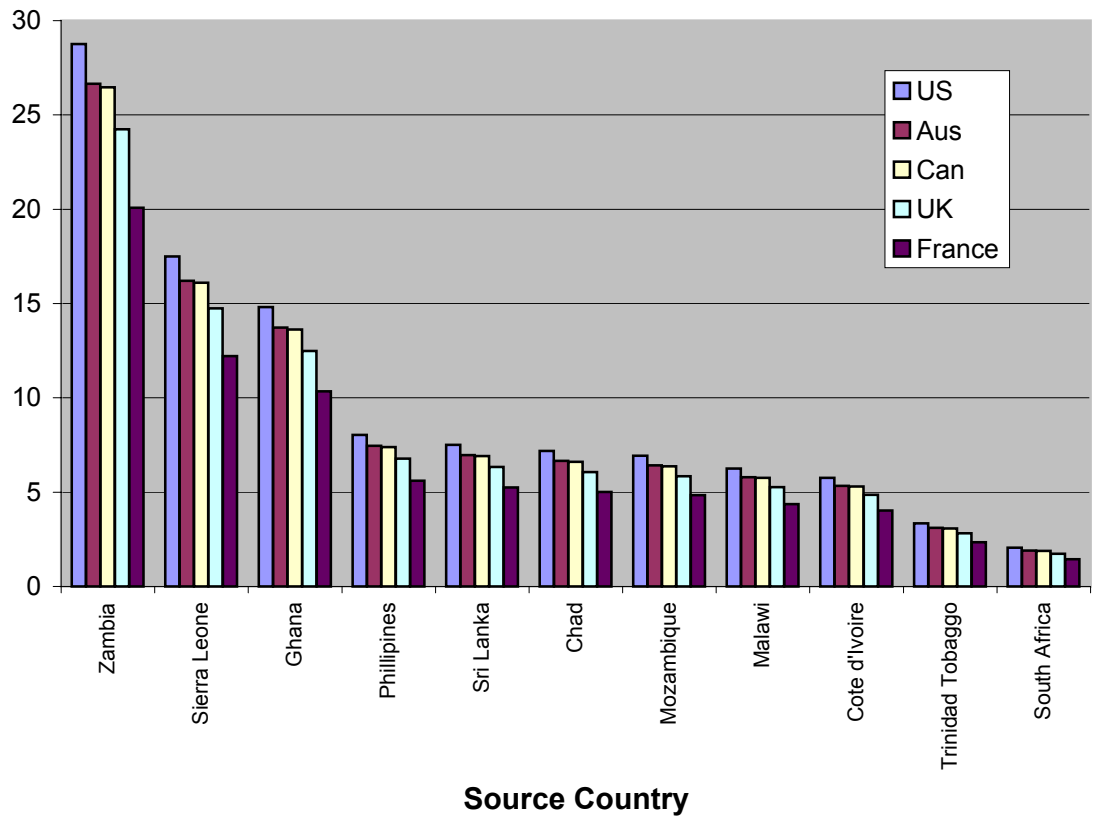

Supplement: MOESM3 [file 9570258]
